# Supplementary material for: Morphological control and molecular recognition by bis-urea hydrogen bonding in micelles of amphiphilic tri-block copolymers
Source: Royal Society of Chemistry journal article supplement (doi:10.1039/b507171b), 2005-01-01
Supplement: b507171b.pdf [file b507171b.pdf]

# Electronic Supplementary Information

## Morphological control and molecular recognition by bis-urea hydrogen bonding in micelles of amphiphilic tri-block copolymers.

Natalia Chebotareva, Paul H.H. Bomans, Peter M. Frederik, Nico A. J. M. Sommerdijk, Rint P. Sijbesma\*

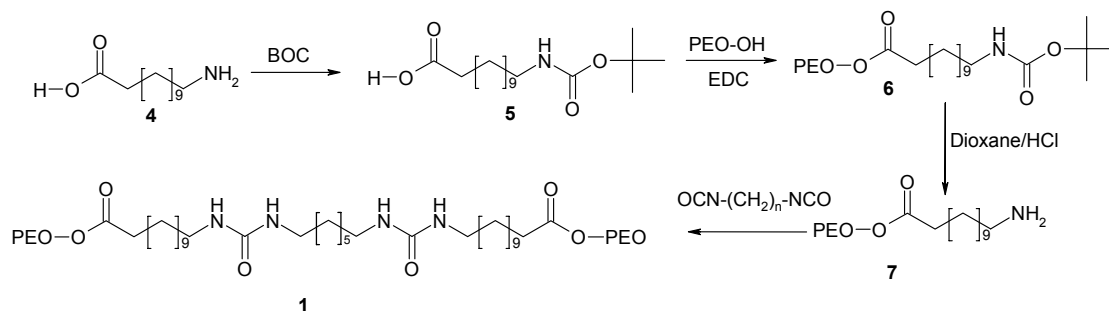

**Scheme 1.** Synthesis of compound 1.

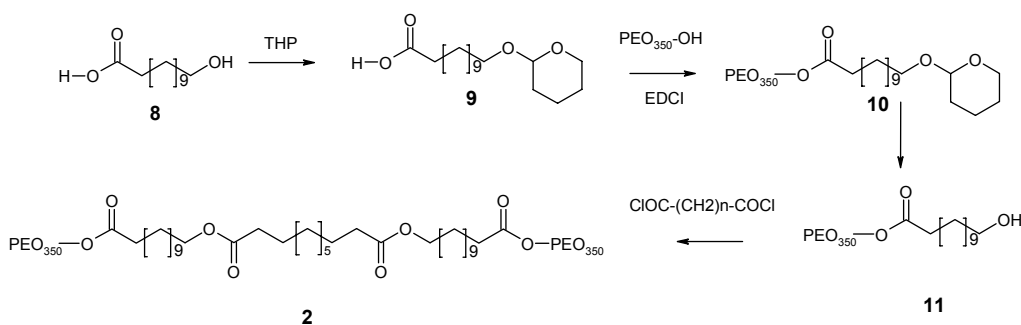

**Scheme 2.** Synthesis of compound 2.

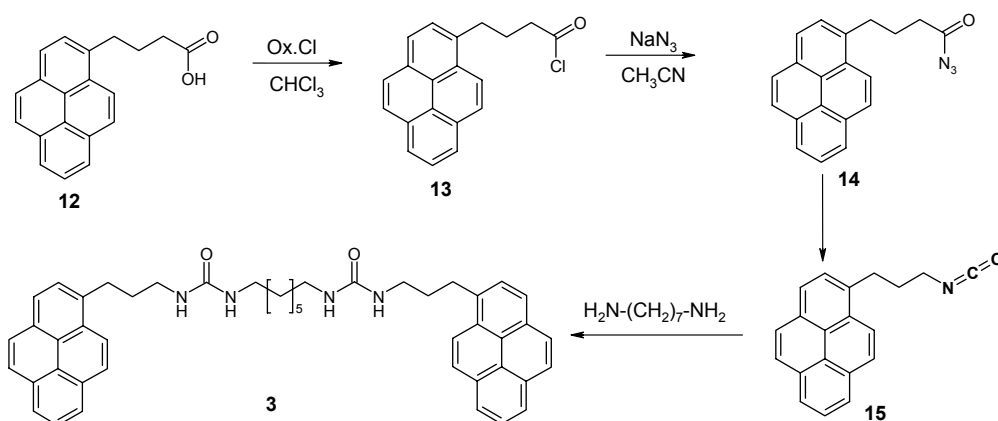

**Scheme 3.** Synthesis of compound 3.

### Experimental section:

**Materials:** Solvents used in the synthesis were reagent grade. THF and toluene were freshly distilled from Na metal. CH<sub>2</sub>Cl<sub>2</sub>, CHCl<sub>3</sub>, DMF, Et<sub>3</sub>N and Pyridine were distilled from CaH<sub>2</sub>. All PEO derivatives were dried in vacuum over P<sub>2</sub>O<sub>5</sub> during at least 12h. Reagents were purchased from Aldrich, Fluka, or Acros and were used without additional purification.

N-(*tert*-butyloxycarbonyl)-12-aminododecanoic acid<sup>1</sup> (5), 12-(tetrahydropyranyloxy)-dodecanoic acid<sup>2</sup> (9) and di-*tert*-butyl tricarboxylate<sup>3</sup> were prepared according to literature procedures.

**Methods:** <sup>1</sup>H and <sup>13</sup>C NMR spectra were acquired on either a Bruker 400 MHz or Varian Gemini 300 MHz spectrometer. Infrared spectra were measured on a Perkin Elmer 1600 FT-IR. Size exclusion chromatography (SEC) was performed on a Shimadzu LC10-AT, using a Polymer Laboratories Plgel 5μm Mixed-D column, a Shimadzu RID-6A detector and THF as an eluent. Molecular weights were calculated relative to polystyrene standards. Matrix assisted laser desorption ionization time-of-flight mass spectroscopy (MALDI-TOF) was performed on a Perseptive DE PRO Voyager MALDI-TOF mass spectrometer using a dithranol as a matrix. Sample for cryogenic transmission electron microscopy (cryo-TEM) were prepared in a 'Vitrobot' instrument<sup>4</sup> (PC controlled vitrification robot, patent applied, Frederik et al 2002, patent licensed to FEI) at room temperature and a relative humidity >95%. In the preparation chamber of the 'Vitrobot' a 3μl sample was applied on a Quantifoil grid (R 2/2, Quantifoil Micro Tools GmbH; freshly glow discharged just prior to use), excess liquid was blotted away and the thin film thus formed was shot (acceleration about 3 g) into liquid ethane. The vitrified film was transferred to a cryoholder (Gatan 626) and observed at -170°C in a Philips CM12 microscope operating at 120kV. Micrographs were taken at low dose conditions.

**N-(*tert*-butyloxycarbonyl)-12-aminododecanoyl-(poly(ethyleneglycol)-monomethylether)-ester (6).** In a 50 ml two-neck round-bottom flask 3.6 g (11.4 mmol) of N-(*tert*-butyloxycarbonyl)-12-aminododecanoic acid (5), 2.19 g (11.4 mmol) of N-(3-dimethylaminopropyl)-N-ethylcarbodiimide hydrochloride and 1.39 g (11.4 mmol) of dimethylaminopyridine were stirred in 5 ml of dry dichloromethane under argon for 20 min. To the resulting solution was added 2 g (5.7 mmol) of poly(ethylene glycol)-monomethyl ether (M<sub>n</sub> ca. 350) and the reaction mixture was stirred overnight. Purification of the product using column chromatography (silica gel, CH<sub>2</sub>Cl<sub>2</sub>/Methanol 9:1 v/v) yielded 3.5 g (92%) of a transparent oil.

<sup>1</sup>H-NMR (300 MHz, CDCl<sub>3</sub>, T=295K): δ = 4.51 (bs, 1H, NH), 4.20 (t, 2H, <sup>3</sup>J(H,H)=4.36Hz, CH<sub>2</sub>OCO), 3.7-3.5 (m, 30H, OCH<sub>2</sub>), 3.36 (s, 3H, OCH<sub>3</sub>), 3.08 (q, 2H, <sup>3</sup>J(H,H)= 6.55Hz, CH<sub>2</sub>N), 2.31 (t, 2H, <sup>3</sup>J(H,H)=7.5Hz, CH<sub>2</sub>CO), 1.59 (p, 2H, <sup>3</sup>J(H,H)=7.1Hz, CH<sub>2</sub>CH<sub>2</sub>CO), 1.42 (s, 9H, CCH<sub>3</sub>), 1.24 (m, 16H, CH<sub>2</sub>).

MALDI-TOF[M+Na<sup>+</sup>] = 704.47 ± n\*44, (calcd: 704.91 ± n\*44).

1) I.T. Dorn, K.R. Neumaier, R. Tampe, *J. Am. Chem. Soc.* 1998, **120**, 2753-2763.

2) A. Sadownik, J. Stefely, S.L. Regen, *J. Am. Chem. Soc.* 1986, **108**, 7789-7791.

3) C.S. Dean, D.S. Tarbell, A.W. Friederang, *J. Org. Chem.* 1970, **35**, 3393-3397.

4) P.M. Frederik, D. H. W. Hubert, *Methods Enzymol.*, 2005, **391**, 431-448.

FT-IR ( $\text{cm}^{-1}$ ): 3365.69 (NH), 2924.93, 2856.04 ( $\text{CH}_2$ ), 1735.62(CO), 1712.81(CO), 1520.59(CN), 1455.12, 1390.52, 1365.06, 1248.53, 1170.93, 1105.27, 1040.59, 951.32, 861.89, 781.17.

**12-Aminododecanoyl-(poly(ethylene glycol)-monomethylether)-ester (7).** To 30 ml of a 4 M HCl solution in dioxane was added 3 g (4.4 mmol) of N-(*tert*-butoxycarbonyl)-12-aminododecanoyl-(poly(ethyleneglycol)-monomethylether)-ester (6) and the solution was stirred at  $0^\circ\text{C}$  for 1 h and subsequently at room temperature for 2 h. The solvent was evaporated to yield 2.7 g (100%) of the product as its hydrochloric salt, which was used without further purification.

$^1\text{H-NMR}$  (300 MHz,  $\text{CDCl}_3$ ,  $T=295\text{K}$ ):  $\delta$  = 8.17 (bs, 3H,  $\text{NH}_3^+$ ), 4.19 (t, 2H,  $^3J(\text{H,H})=4.26\text{Hz}$ ,  $\text{CH}_2\text{OCO}$ ), 3.7-3.5 (m, 30H,  $\text{OCH}_2$ ), 3.36 (s, 3H,  $\text{OCH}_3$ ), 2.94 (bs, 2H,  $\text{CH}_2\text{N}$ ), 2.29 (t, 2H,  $^3J(\text{H,H})=7.4\text{Hz}$ ,  $\text{CH}_2\text{CO}$ ), 1.73 (p, 2H,  $^3J(\text{H,H})=6.5\text{ Hz}$ ,  $\text{CH}_2\text{CH}_2\text{N}$ ) 1.58 (p, 2H,  $^3J(\text{H,H})=7.2\text{Hz}$ ,  $\text{CH}_2\text{CH}_2\text{CO}$ ), 1.23 (m, 14H,  $\text{CH}_2$ ).

FT-IR ( $\text{cm}^{-1}$ ): 2915.54, 2848.31 ( $\text{CH}_2$ ), 1736.93(CO), 1712.81(CO-BOC), 1577.82, 1518.6, 1464.6, 1390.30, 1348.14, 1325.6, 1294.19, 1266.58, 1237.63, 1182.33, 1103.947, 1044.32, 960.77, 857.86, 777.03, 730.53, 721.73.

**Bis-1,7-{12-[Polyethyleneglycol(monomethylether)-carbonyl]-undecyl} -ureido}-heptane (1).** To a solution of 0.216 g (1.65 mmol) of 1,7-diaminoheptane in 1 ml of dichloromethane, a solution of di-*tert*-butyl tricarboxylate (0.977 g, 3.74 mmol) in dichloromethane (1 ml) was injected. The reaction mixture was stirred for 30 min. A drop of pyridine was added to quench the excess of di-*tert*-butyl tricarboxylate and the reaction mixture was stirred for another 10 min. A solution of 12-aminododecanoyl-(poly(ethylene glycol)-monomethylether)-ester 7 (2 g, 3.4 mmol) and triethylamine (0.94 ml, 6.8 mmol) in 2 ml dichloromethane was added and stirred overnight. The solution was concentrated and purified by precipitation from diethyl ether to give 0.5 g (20%) of the product as a white solid.

$^1\text{H-NMR}$  (300 MHz,  $\text{CDCl}_3$ ,  $T=295\text{K}$ ):  $\delta$  = 4.94 (bs, 4H,  $\text{NH}$ ), 4.2 (t, 4H,  $^3J(\text{H,H})=4.6\text{Hz}$ ,  $\text{CH}_2\text{OCO}$ ), 3.7-3.5 (m, 60H,  $\text{OCH}_2$ ), 3.36 (s, 6H,  $\text{OCH}_3$ ), 3.12 (m, 8H,  $\text{CH}_2\text{N}$ ), 2.32 (t, 4H,  $^3J(\text{H,H})=7.5\text{Hz}$ ,  $\text{CH}_2\text{CO}$ ), 1.59 (p, 4H,  $^3J(\text{H,H})=6.6\text{ Hz}$ ,  $\text{CH}_2\text{CH}_2\text{N}$ ) 1.44 (m, 8H,  $\text{CH}_2$ ), 1.3 (m, 34H,  $\text{CH}_2$ ).

$^{13}\text{C-NMR}$  (400 MHz,  $\text{CDCl}_3$ ,  $T=295\text{K}$ ):  $\delta$  = 173.94, 159.3, 99.91, 94.47, 71.97, 70.65, 70.61, 70.54, 69.25, 63.42, 59.07, 40.52, 40.08, 34.25, 30.42, 29.9, 29.63, 29.59, 29.49, 29.47, 29.32, 29.17, 27.04, 26.36, 24.95

FT-IR ( $\text{cm}^{-1}$ ): 3335.96 (NH), 2921.89, 2850.17 ( $\text{CH}_2$ ), 1731.88(CO), 1610.78 ( $\text{C=O}$  stretching), 1572.35, 1476.44, 1464.08, 1349.28, 1318.59, 1264.22, 1232.4, 1211.71, 1101.94, 1038.09, 950.53, 852.78, 769.73, 724.47.

GPC (THF; PS standards):  $M_n$  = 1200 g/mol, PDI = 1.04.

MALDI-TOF [ $M+\text{Na}^+$ ] =  $1279.8 \pm n*44$  (calcd:  $1280 \pm n*44$ ).

**12-(Tetrahydropyranyloxy)-dodecanoyl-(Poly(ethyleneglycol)-monomethyl ether)-ester (10).** In a 50 ml two-neck round-bottom flask 2.9 g (9.65 mmol) of 12-(tetrahydropyranyloxy)-dodecanoic-acid (9), 1.83 g (9.65 mmol) of N-(3-dimethylaminopropyl)-N-ethylcarbodiimide hydrochloride and 1.17 g (9.65 mmol) of dimethylaminopyridine were stirred in 7 ml of dry dichloromethane under argon for 20

min. To the resulting solution was added 6.75 g (19.3 mmol) of poly(ethyleneglycol)-monomethyl ether ( $M_n$  ca. 350) and the solution was stirred overnight. The product was purified using column chromatography (silica gel,  $\text{CH}_2\text{Cl}_2/\text{Methanol}$  9.5 : 0.5 v/v) to give 5.3 g (88.1%) of the product as a transparent oil.

$^1\text{H-NMR}$  (400 MHz,  $\text{CDCl}_3$ ,  $T=295\text{K}$ ):  $\delta$  = 4.56 (t, 1H,  $\text{CH}$ ), 4.21 (t, 2H,  $^3J(\text{H,H})=4.87\text{Hz}$ ,  $\text{CH}_2\text{OCO}$ ), 3.87-3.38 (m, 41H,  $\text{OCH}_2$ ,  $\text{OCH}_3$ ,  $\text{CH}_2\text{THP}$ ), 2.31 (t, 2H,  $^3J(\text{H,H})=7.16\text{Hz}$ ,  $\text{CH}_2\text{CO}$ ), 1.83-1.25 (m, 24H,  $\text{CH}_2$ ).

$^{13}\text{C-NMR}$  (400 MHz,  $\text{CDCl}_3$ ,  $T=295\text{K}$ ):  $\delta$  = 174.06, 149.74, 99.06, 72.15, 70.84, 70.82, 70.79, 70.73, 69.42, 67.91, 63.57, 62.55, 59.24, 34.42, 31.01, 29.97, 29.78, 29.75, 29.7, 29.66, 29.49, 29.35, 26.45, 25.72, 25.12, 22.21, 19.92.

FT-IR ( $\text{cm}^{-1}$ ): 2924.48, 2855.98, 1735.5, 14.55.75, 1350.21, 1323.06, 1285.05, 1250.73, 1200.01, 1104.3, 1032.15, 987.82, 950.81, 906.06, 868.0, 814.37, 753.73, 723.24.

**12-Hydroxydodecanoyl-(poly(ethyleneglycol)-monomethylether)-ester (11).** To a solution of 3 g (4.61 mmol) of 12-(tetrahydropyranyloxy)-dodecanoyl-(poly(ethyleneglycol)-monomethylether)-ester (**10**) in ethanol (45 ml) warmed up to 45 °C, 0.2 g of pyridinium *p*-toluenesulfonate and 0.17 g of *p*-toluene sulfonic acid were added. The reaction mixture was stirred for 2 h at 45 °C. The solvent was evaporated and the residue was redissolved in chloroform, washed with sodium bicarbonate solution (1M) and dried over magnesium sulfate. Yield: 2.38 g (96%) of a transparent oil.

$^1\text{H-NMR}$  (400 MHz,  $\text{CDCl}_3$ ,  $T=295\text{K}$ ):  $\delta$  = 4.21 (t, 2H,  $^3J(\text{H,H})=4.26\text{Hz}$ ,  $\text{CH}_2\text{OCO}$ ), 3.7-3.53.38 (m, 32H,  $\text{OCH}_2$ ), 2.31 (t, 2H,  $^3J(\text{H,H})=7.73\text{Hz}$ ,  $\text{CH}_2\text{CO}$ ), 1.2-1.52 (m, 4H,  $\text{CH}_2$ ), 1.3-1.19 (m, 14H,  $\text{CH}_2$ ).

$^{13}\text{C-NMR}$  (400 MHz,  $\text{CDCl}_3$ ,  $T=295\text{K}$ ):  $\delta$  = 174.07, 72.15, 70.79, 70.73, 69.43, 63.58, 62.25, 59.25, 34.42, 33.01, 31.01, 29.97, 29.75, 29.68, 29.61, 29.44, 29.31, 25.95, 25.01, 19.92.

FT-IR ( $\text{cm}^{-1}$ ): 3502.14, 2924.51, 2855.61, 1734.43, 1456.13, 1349.59, 1285.05, 1249.19, 1102.72, 949.36, 852.29.

GPC (THF; PS standards):  $M_n$  = 390 g/mol, PDI = 1.04.

MALDI-TOF [ $M+\text{Na}^+$ ] =  $605.26 \pm n*44$  (calcd:  $605.73 \pm n*44$ )

**Undecanedioic acid-bis-[11-{(poly(ethylene glycol-oxicarbonyl)-undecyl} ester (2).**

To a solution of 2 g (3.7 mmol) 12-hydroxydodecanoyl-(poly(ethyleneglycol)-monomethylether)-ester (**11**) and 0.52 g (4.25 mmol) of 4-dimethylaminopyridine in 5 ml of dichloromethane was added 0.47 g (1.85 mmol) of freshly prepared undecanedioyl dichloride in 1 ml of dichloromethane and the mixture was stirred overnight. Purification by column chromatography (silica gel,  $\text{CH}_2\text{Cl}_2/\text{Methanol}$  9:1 v/v,  $R_f=0.5$ ) yielded 1.5 g (64%) of the product as a waxy solid.

$^1\text{H-NMR}$  (400 MHz,  $\text{CDCl}_3$ ,  $T=295\text{K}$ ):  $\delta$  = 4.20 (t, 4H,  $^3J(\text{H,H})=4.47\text{Hz}$ ,  $\text{CH}_2\text{OCO}$ ), 4.03 (t, 4H,  $^3J(\text{H,H})=6.72\text{Hz}$ ,  $\text{CH}_2\text{OCO}$ ), 3.68-3.52 (m, 60H,  $\text{OCH}_2$ ), 3.36 (s, 6H,  $\text{OCH}_3$ ), 2.30 (m, 4H,  $\text{CH}_2\text{CO}$ ), 1.59 (m, 8H,  $\text{CH}_2$ ), 1.25 (m, 42H,  $\text{CH}_2$ ).

$^{13}\text{C-NMR}$  (400 MHz,  $\text{CDCl}_3$ ,  $T=295\text{K}$ ):  $\delta$  = 174.01, 173.85, 99.9, 71.99, 70.67, 70.63, 70.57, 69.25, 64.43, 63.4, 59.08, 34.42, 34.24, 29.55, 29.47, 29.31, 29.3, 29.25, 29.17, 28.71, 25.97, 25.04, 24.94.

FT-IR ( $\text{cm}^{-1}$ ): 2924.75, 2856.26, 1733.52, 1460.42, 1349.93, 1249.97, 1106.79, 949.29, 853.93.

GPC (THF; PS standards):  $M_n = 900$  g/mol, PDI = 1.05.

MALDI-TOF  $[M+Na^+] = 1279.71 \pm n*44$  (calcd:  $1280.7 \pm n*44$ ).

**Bis-1,7-{3-pyrenyl}-propane-ureido}-heptane (3).** To a suspension of 1-pyrene butyric acid (1 g, 3.4 mmol) and oxalyl chloride (0.44 ml) in chloroform, 50  $\mu$ l of dry DMF was added and the mixture was stirred for 10 min. After evaporation of solvent, acetonitrile (5 ml) was added and the reaction mixture was heated up to 85 °C, followed by addition of  $NaN_3$  (0.243 g). To complete the conversion of azide to isocyanide, the reaction mixture was stirred for 5h at 85 °C. 1,7-diaminoheptane was added and the reaction mixture was stirred for another 50 h at 50 °C. The product was filtered off and washed with chloroform and methanol and finally reprecipitated from a  $CHCl_3/MeOH$  (7:3 v/v) mixture.

$^1H$ -NMR (400 MHz,  $CDCl_3:TFA$ , T=295K):  $\delta$  = 8.21-7.81 (m, 18H, Ar-H), 3.42 (t, 4H,  $^3J(H,H)=7.13$ Hz,  $\underline{CH_2}N$ ), 3.3 (t, 4H,  $^3J(H,H)=6.57$ Hz,  $\underline{CH_2}N$ ), 2,4 (bs, 4H,  $\underline{CH_2}$ -Ar), 2.18 (p, 4H,  $^3J(H,H)=7.03$ Hz,  $\underline{CH_2}$ ), 0.99 (p, 4H,  $^3J(H,H)=7.09$ Hz,  $\underline{CH_2}$ ), 0.76 (m, 6H,  $\underline{CH_2}$ ).

$^{13}C$ -NMR (400 MHz,  $CDCl_3:TFA$ , T=295K):  $\delta$  = 160.81, 134.16, 131.33, 130.69, 130.28, 128.5, 127.99, 127.27, 127.17, 126.19, 125.33, 125.08, 124.95, 124.74, 122.69, 122.46, 115.88, 113.04, 41.12, 40.87, 30.48, 29.3, 27.62, 25.44.

MALDI-TOF  $[M^+] = 701.36$  (calcd. for  $C_{47}H_{48}N_4O_2$ : 700.93)

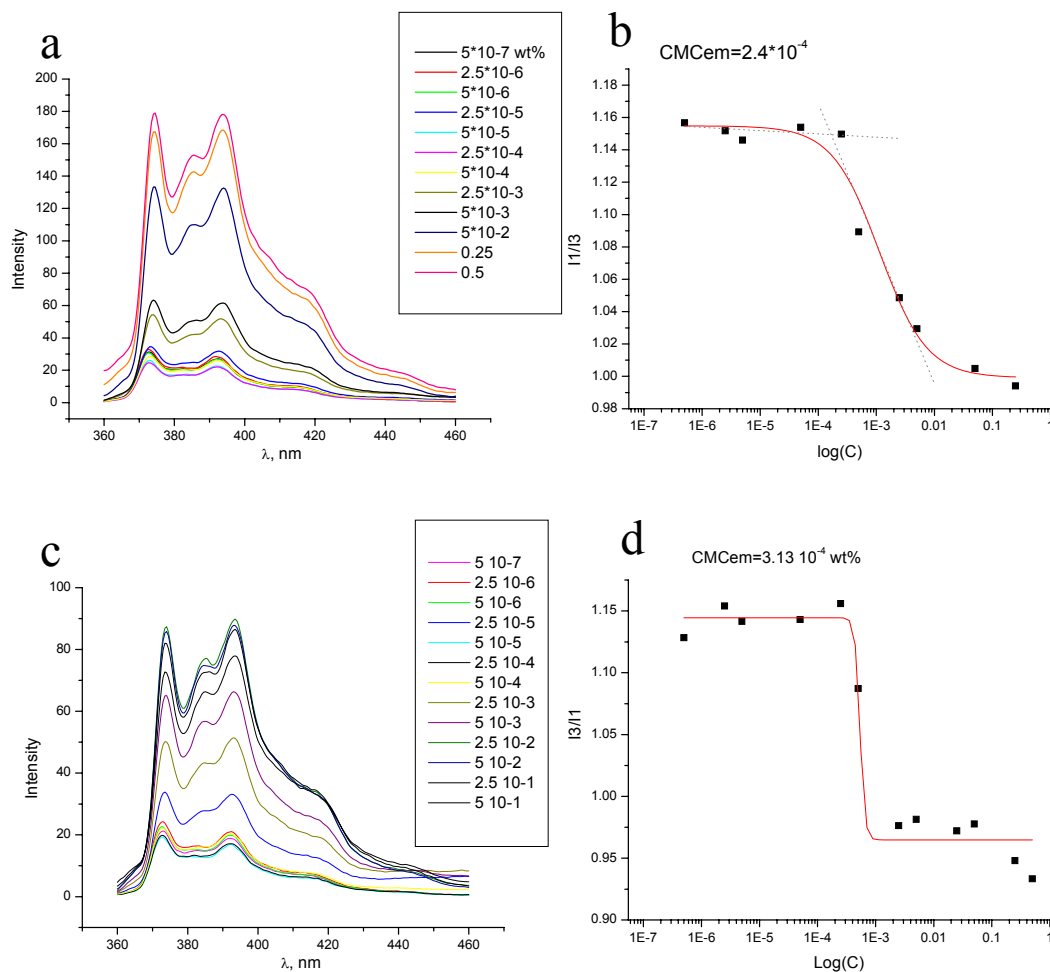

**S11.** Determination of critical micelle concentration of compounds **1** and **2** using pyrene as a fluorescence probe. a) Pyrene emission spectra of aqueous solutions containing different concentrations of **1**. b) Ratio of intensities of peak 1 and peak 3  $I_1/I_3$  in the spectra from (a) versus concentration; The cmc is taken as the concentration at which the ratio starts to decrease. c) Pyrene emission spectra of aqueous solutions containing different concentrations of **2**. d) Ratio of intensities of peak 1 and peak 3  $I_1/I_3$  in the spectra from (c) versus concentration. The cmc is taken as the concentration at which the ratio starts to decrease;

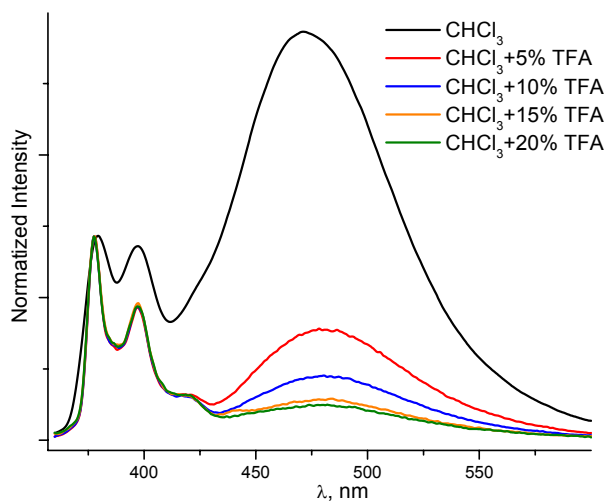

**SI 2.** Normalized fluorescence spectra of  $10^{-6}$  M of **3** in  $\text{CHCl}_3$  at various concentrations of TFA.
